# Supplementary material
Source: MDPI journal article supplement (https://www.mdpi.com/2073-4395/9/3/124)
Supplement: s1 [file s1]

Supplementary figure.

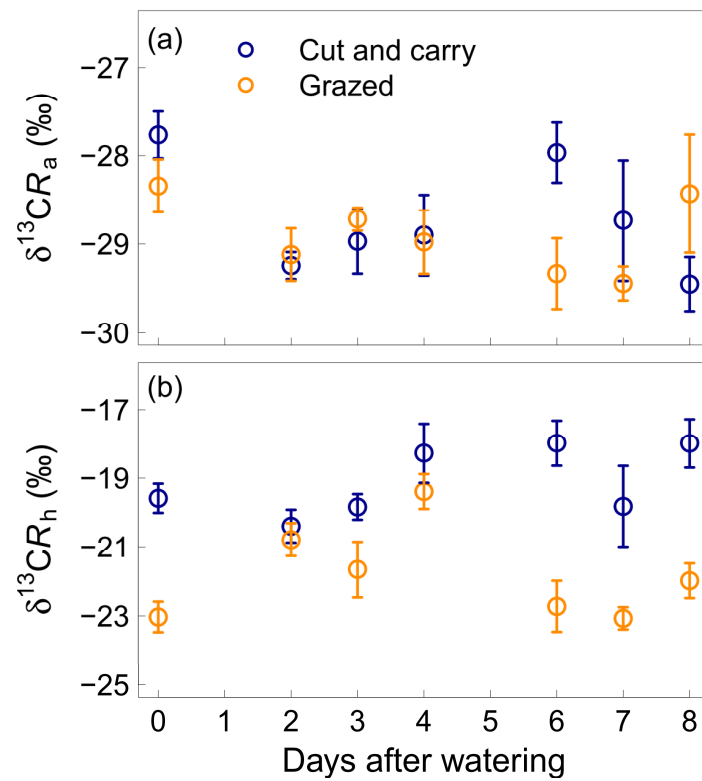

$^{13}\text{C}$  isotopic signature of  $\text{CO}_2$  respired from the roots ( $\delta^{13}\text{C}R_a$ , panel **a**) and of  $\text{CO}_2$  respired from root and rhizosphere free soil ( $\delta^{13}\text{C}R_h$ , panel **b**) over the days after adding 100 mm of water in the grazed (orange circles) and mown (blue circles) grasslands. Vertical bars represent one standard error of the mean ( $n = 4$ ).
